# Supplementary material for: Genetic Diversity and Population Structure of Cylindrocarpon-like Fungi Infecting Ginseng Roots in Northeast China
Source: MDPI journal article supplement (doi:10.3390/jof8080814), 2022-08-02
Supplement: s1 [file s1]

Supplementary Materials for

# Genetic diversity and population structure of *Cylindrocarpon*-like fungi infecting ginseng roots in Northeast China

Figure S1 to S8 & Table S1 and S2

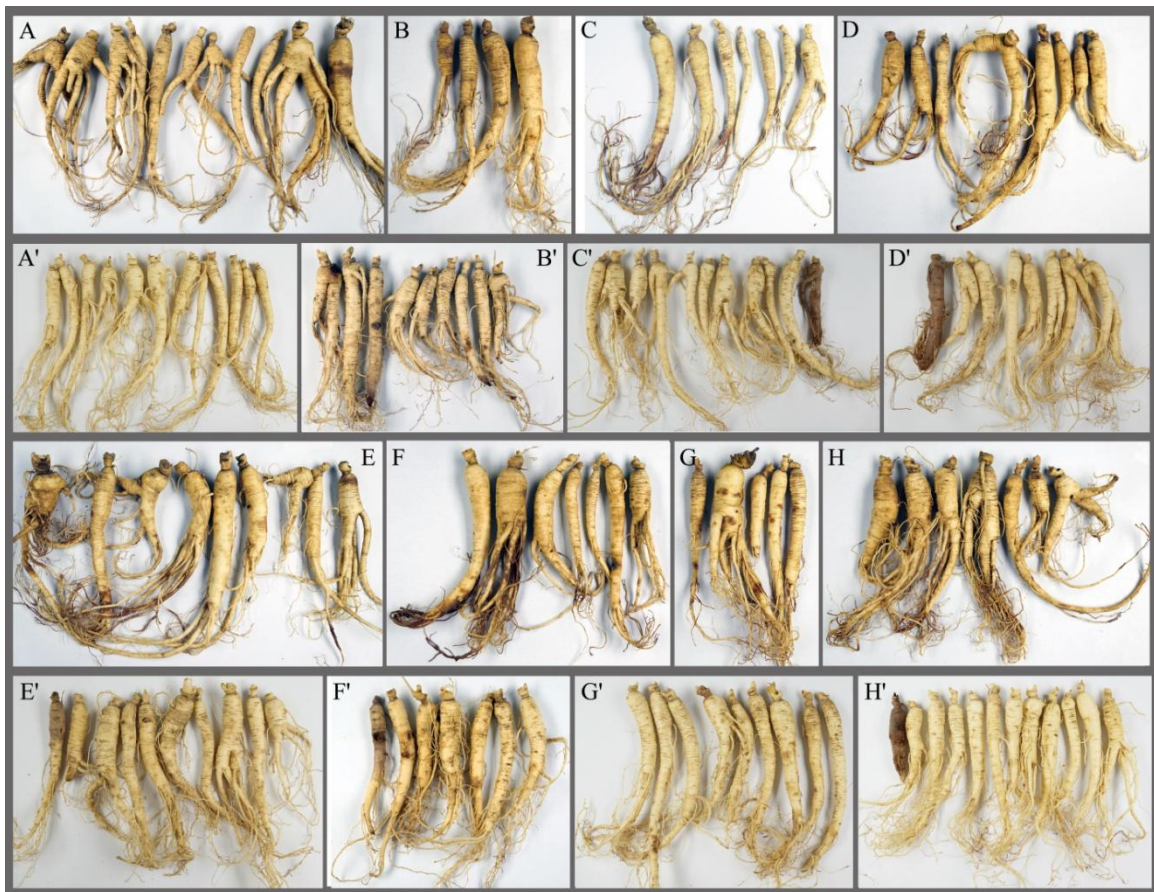

**Figure S1.** Pathogenicity test of CLF isolates obtained from *Panax ginseng* roots. A to H: virulence on *P. ginseng*, A' to H': virulence on *P. quinquefolius*; A & A': mock; B & B': *Dactylonectria hordeicola*; C & C': *Dactylonectria* sp.; D & D': *Ilyonectria changbaiensis*; E & E': *I. communis*; F & F': *I. mors-panacis*; G & G': *I. qitaiheensis*; H & H': *I. robusta*.

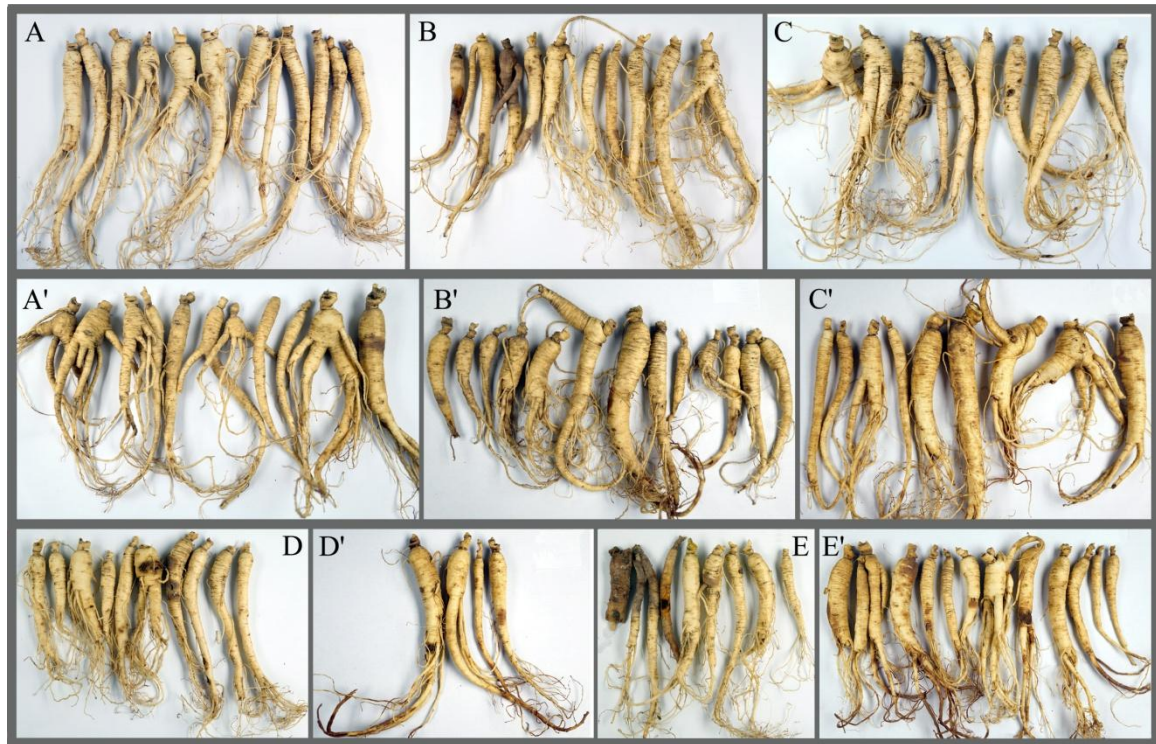

**Figure S2.** Pathogenicity test of CLF isolates obtained from *P. quinquefolius* roots. A to H: virulence on *P. quinquefolius*, A' to H': virulence on *P. ginseng*; A & A': mock; B & B': *Dactylonectria* sp.; C & C': *Ilyonectria communis*; D & D': *I. mors-panacis*; E & E': *I. robusta*.

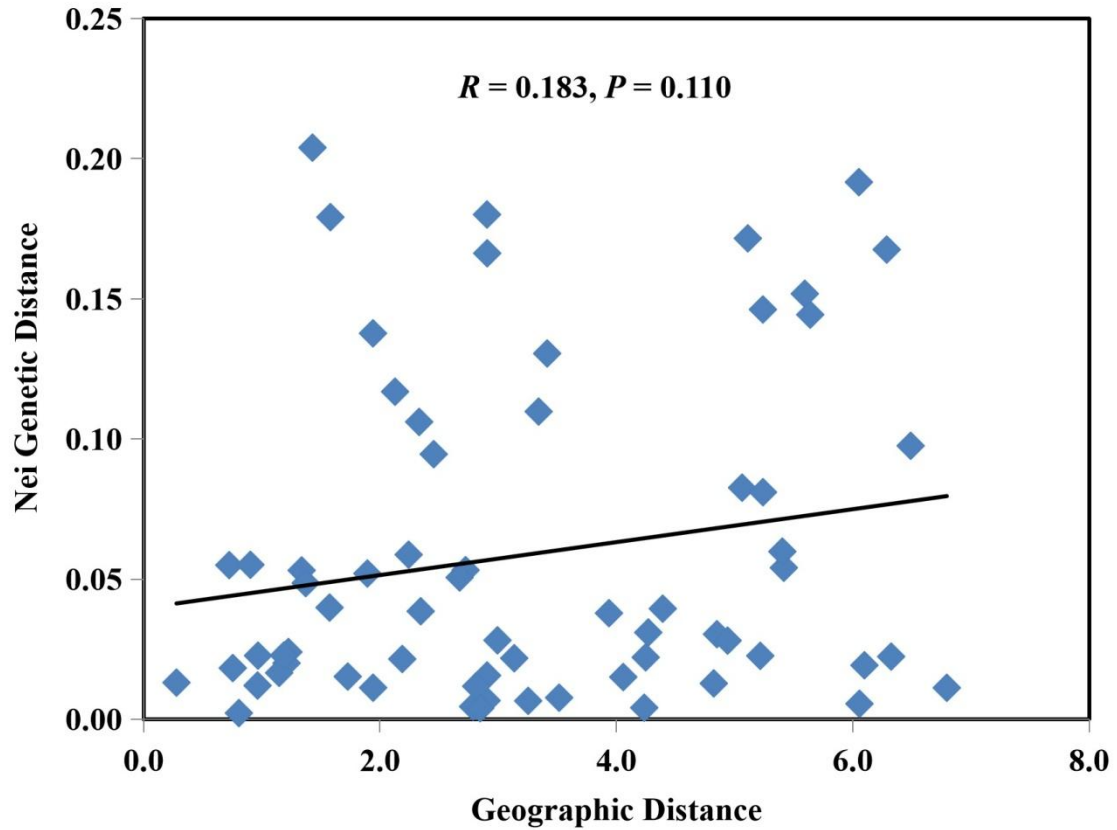

**Figure S3.** Correlation between genetic differentiation based on Nei's genetic distance and geographic distance among 12 populations of CLF isolates by using Mantel test with GenAlEx.

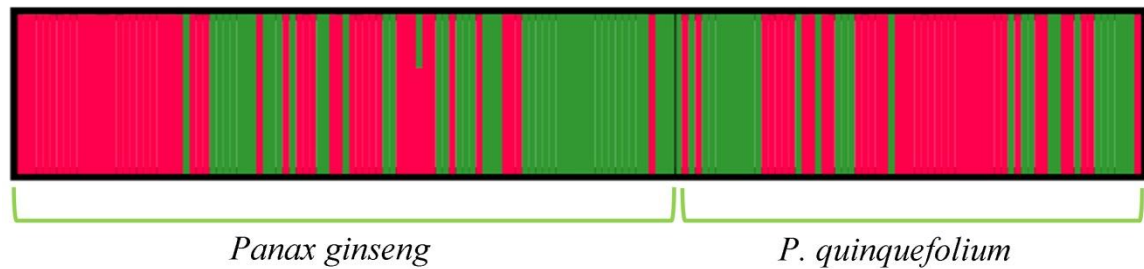

**Figure S4.** Population structure of CLF isolates analyzed by using STRUCTURE program. Two clusters ( $K = 2$ ) were identified from two populations sampled from *Panax ginseng* and *P. quinquefolius* respectively.

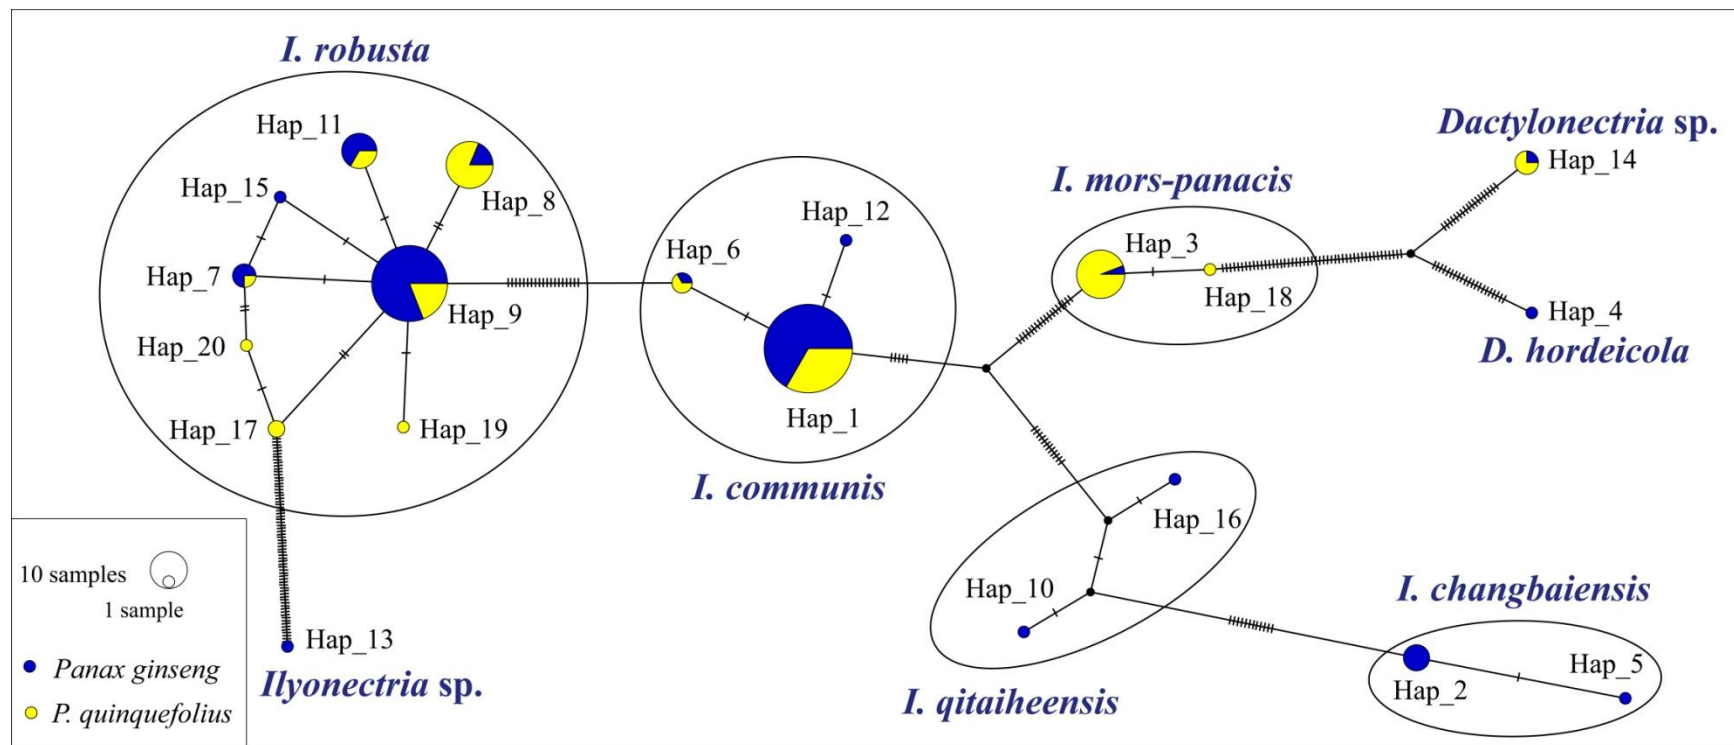

**Figure S5.** TCS haplotype network based on partial sequence of the *his3* gene representing two populations of CLF isolates from *Panax ginseng* (blue) and *P. quinquefolius* (yellow). The size of the circle represents the haplotype frequencies in populations. Hatch marks indicate the number of mutations.



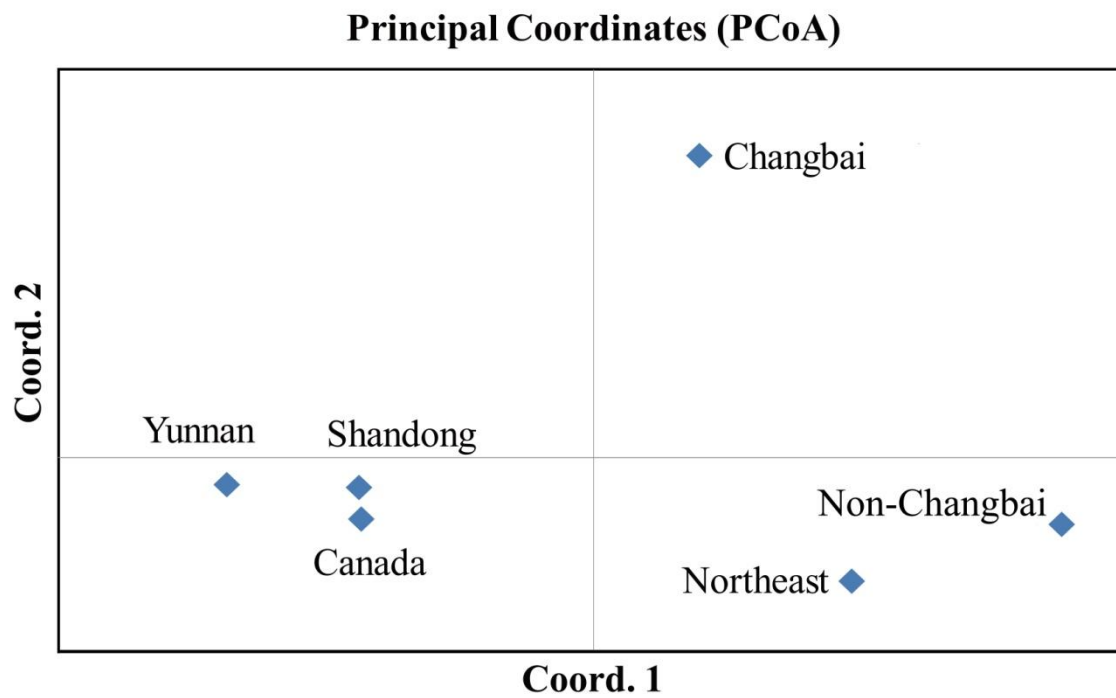

**Figure S6.** Principal coordinate analysis of 6 populations of CLF isolates from *Panax* species worldwide based on Nei's genetic distance by using GenAlEx. Axes 1 and 2 of the PCoA accounted for 83.21% and 11.96% of the total genetic variation.

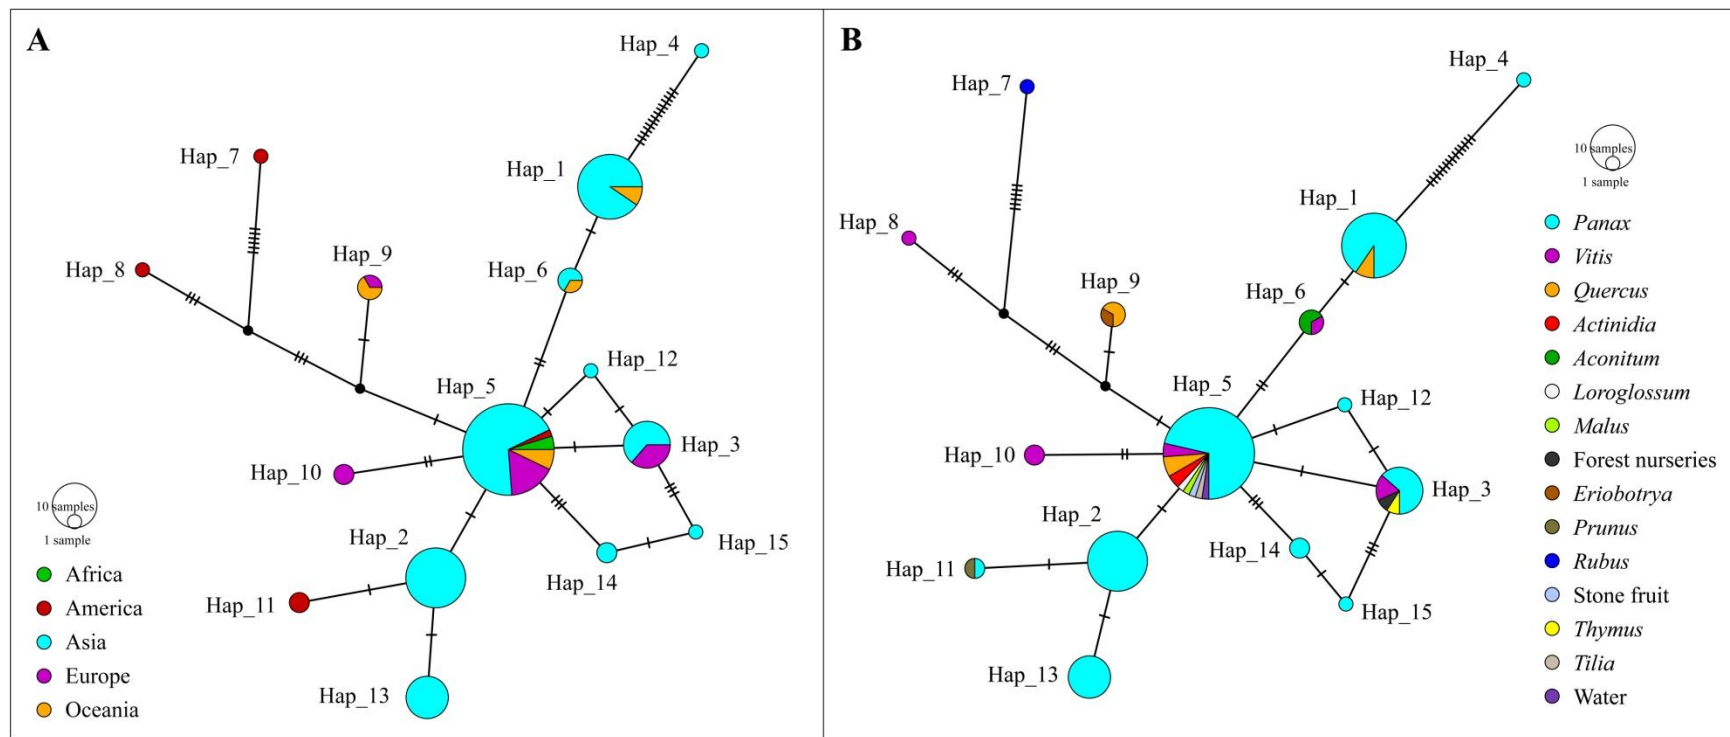

**Figure S7.** TCS haplotype network based on partial sequence of the *his3* gene representing worldwide *Ilyonectria robusta* isolates. A: geographical populations; B: populations divided based on hosts. The size of the circle represents the haplotype frequencies in populations. Hatch marks indicate the number of mutations.

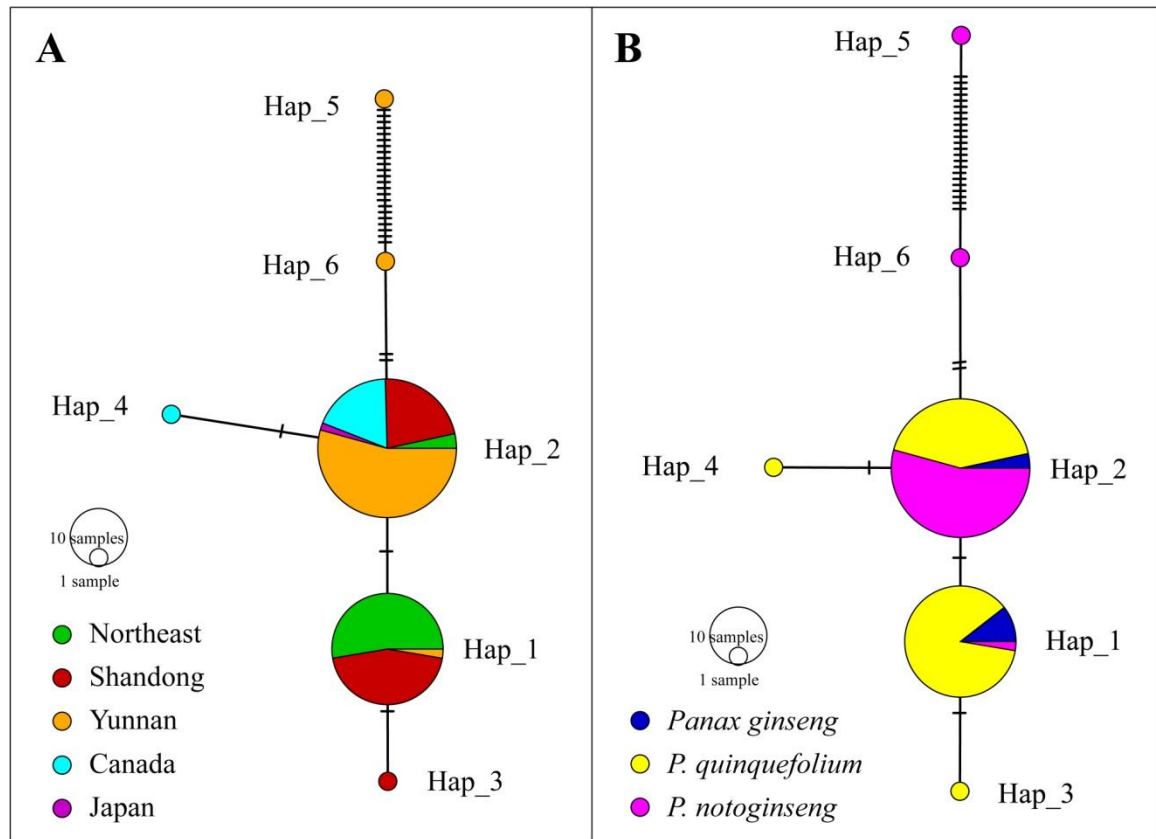

**Figure S8.** TCS haplotype network generated based on partial sequence of the *his3* gene representing worldwide *Ilyonectria mors-panacis* isolates. A: geographical populations; B: populations divided based on hosts. The size of the circle represents the haplotype frequencies in populations. Hatch marks indicate the number of mutations.

**Table S1. CLF isolates obtained from *Panax ginseng* or *P. quinquefolius* in Northeast China**

| Isolate number | Species                 | Host                    | Location(province, city, county, town) | Year collected | Haplotype | GenBank accession number | Population code | Latitude, longitude |
|----------------|-------------------------|-------------------------|----------------------------------------|----------------|-----------|--------------------------|-----------------|---------------------|
| 301            | <i>I. communis</i>      | <i>P. ginseng</i>       | Jilin, Baishan, Changbai, Baoquanshan  | 2012           | Hap_1     | MF350433                 | JBC             | 41.52N, 127.46E     |
| 320            | <i>I. changbaiensis</i> | <i>P. ginseng</i>       | Jilin, Baishan, Changbai, Baoquanshan  | 2012           | Hap_2     | MF350443                 | JBC             | 41.52N, 127.46E     |
| 408            | <i>I. communis</i>      | <i>P. ginseng</i>       | Jilin, Baishan, Changbai, Baoquanshan  | 2012           | Hap_1     | -                        | JBC             | 41.52N, 127.46E     |
| 423            | <i>I. communis</i>      | <i>P. ginseng</i>       | Jilin, Baishan, Changbai, Baoquanshan  | 2012           | Hap_1     | -                        | JBC             | 41.52N, 127.46E     |
| 608            | <i>I. communis</i>      | <i>P. ginseng</i>       | Jilin, Baishan, Changbai, Baoquanshan  | 2012           | Hap_1     | -                        | JBC             | 41.52N, 127.46E     |
| 610            | <i>I. changbaiensis</i> | <i>P. ginseng</i>       | Jilin, Baishan, Changbai, Baoquanshan  | 2012           | Hap_5     | MT043275                 | JBC             | 41.52N, 127.46E     |
| 616            | <i>I. communis</i>      | <i>P. ginseng</i>       | Jilin, Baishan, Changbai, Baoquanshan  | 2012           | Hap_1     | -                        | JBC             | 41.52N, 127.46E     |
| 1506           | <i>I. changbaiensis</i> | <i>P. ginseng</i>       | Jilin, Baishan, Changbai, Baoquanshan  | 2012           | Hap_2     | MF350440                 | JBC             | 41.52N, 127.46E     |
| 1512           | <i>I. communis</i>      | <i>P. ginseng</i>       | Jilin, Baishan, Changbai, Baoquanshan  | 2012           | Hap_1     | -                        | JBC             | 41.52N, 127.46E     |
| 1524           | <i>I. communis</i>      | <i>P. ginseng</i>       | Jilin, Baishan, Changbai, Baoquanshan  | 2012           | Hap_1     | -                        | JBC             | 41.52N, 127.46E     |
| 1606           | <i>I. communis</i>      | <i>P. ginseng</i>       | Jilin, Baishan, Changbai, Baoquanshan  | 2012           | Hap_1     | -                        | JBC             | 41.52N, 127.46E     |
| 1712           | <i>I. communis</i>      | <i>P. ginseng</i>       | Jilin, Baishan, Changbai, Baoquanshan  | 2012           | Hap_1     | -                        | JBC             | 41.52N, 127.46E     |
| 1803           | <i>I. changbaiensis</i> | <i>P. ginseng</i>       | Jilin, Baishan, Changbai, Baoquanshan  | 2012           | Hap_2     | MF350441                 | JBC             | 41.52N, 127.46E     |
| 4404           | <i>I. changbaiensis</i> | <i>P. ginseng</i>       | Jilin, Baishan, Changbai, Baoquanshan  | 2012           | Hap_2     | MF350437                 | JBC             | 41.52N, 127.46E     |
| YH12           | <i>I. robusta</i>       | <i>P. quinquefolius</i> | Heilongjiang, Harbin, Yilan, Yilan     | 2014           | Hap_8     | -                        | HHYT            | 46.32N, 129.56E     |
| YH15           | <i>I. robusta</i>       | <i>P. quinquefolius</i> | Heilongjiang, Harbin, Yilan, Yilan     | 2014           | Hap_8     | -                        | HHYT            | 46.32N, 129.56E     |
| YH16           | <i>I. robusta</i>       | <i>P. quinquefolius</i> | Heilongjiang, Harbin, Yilan, Yilan     | 2014           | Hap_8     | -                        | HHYT            | 46.32N, 129.56E     |
| YH17           | <i>I. robusta</i>       | <i>P. quinquefolius</i> | Heilongjiang, Harbin, Yilan, Yilan     | 2014           | Hap_8     | -                        | HHYT            | 46.32N, 129.56E     |
| YH18           | <i>I. robusta</i>       | <i>P. quinquefolius</i> | Heilongjiang, Harbin, Yilan, Yilan     | 2014           | Hap_8     | -                        | HHYT            | 46.32N, 129.56E     |
| YH19           | <i>I. robusta</i>       | <i>P. quinquefolius</i> | Heilongjiang, Harbin, Yilan, Yilan     | 2014           | Hap_8     | -                        | HHYT            | 46.32N, 129.56E     |
| YJ11           | <i>I. mors-panacis</i>  | <i>P. quinquefolius</i> | Jilin, Baishan, Fusong Beigang         | 2014           | Hap_3     | -                        | JBF             | 42.42N, 127.54E     |
| YJ12           | <i>I. robusta</i>       | <i>P. quinquefolius</i> | Jilin, Baishan, Fusong Beigang         | 2014           | Hap_17    | -                        | JBF             | 42.42N, 127.54E     |
| YJ17           | <i>I. mors-panacis</i>  | <i>P. quinquefolius</i> | Jilin, Baishan, Fusong Beigang         | 2014           | Hap_18    | MT043277                 | JBF             | 42.42N, 127.54E     |
| YJ19           | <i>I. mors-panacis</i>  | <i>P. quinquefolius</i> | Jilin, Baishan, Fusong Beigang         | 2014           | Hap_3     | -                        | JBF             | 42.42N, 127.54E     |
| YJ23           | <i>I. robusta</i>       | <i>P. quinquefolius</i> | Jilin, Baishan, Fusong, Lushuihe       | 2014           | Hap_19    | MT043274                 | JBF             | 42.42N, 127.54E     |
| YJ25           | <i>I. robusta</i>       | <i>P. quinquefolius</i> | Jilin, Baishan, Fusong, Lushuihe       | 2014           | Hap_17    | -                        | JBF             | 42.42N, 127.54E     |
| YJ26           | <i>I. robusta</i>       | <i>P. quinquefolius</i> | Jilin, Baishan, Fusong, Lushuihe       | 2014           | Hap_9     | -                        | JBF             | 42.42N, 127.54E     |
| YJ28           | <i>I. communis</i>      | <i>P. quinquefolius</i> | Jilin, Baishan, Fusong, Lushuihe       | 2014           | Hap_1     | -                        | JBF             | 42.42N, 127.54E     |
| YJ29           | <i>I. communis</i>      | <i>P. quinquefolius</i> | Jilin, Baishan, Fusong, Lushuihe       | 2014           | Hap_1     | -                        | JBF             | 42.42N, 127.54E     |
| YJ52           | <i>I. communis</i>      | <i>P. quinquefolius</i> | Jilin, Jilin, Jiaohe, Qianjin          | 2014           | Hap_6     | -                        | JJJ             | 43.63N, 127.73E     |
| YJ54           | <i>I. robusta</i>       | <i>P. quinquefolius</i> | Jilin, Jilin, Jiaohe, Qianjin          | 2014           | Hap_11    | -                        | JJJ             | 43.63N, 127.73E     |
| YJ56           | <i>I. robusta</i>       | <i>P. quinquefolius</i> | Jilin, Jilin, Jiaohe, Qianjin          | 2014           | Hap_9     | -                        | JJJ             | 43.63N, 127.73E     |
| YJ57           | <i>I. communis</i>      | <i>P. quinquefolius</i> | Jilin, Jilin, Jiaohe, Qianjin          | 2014           | Hap_1     | -                        | JJJ             | 43.63N, 127.73E     |



|        |                         |                         |                                         |      |        |          |      |                 |
|--------|-------------------------|-------------------------|-----------------------------------------|------|--------|----------|------|-----------------|
| YJ58   | <i>I. communis</i>      | <i>P. quinquefolius</i> | Jilin, Jilin, Jiaohe, Qianjin           | 2014 | Hap_1  | -        | JJJ  | 43.63N, 127.73E |
| YJ59   | <i>I. robusta</i>       | <i>P. quinquefolius</i> | Jilin, Jilin, Jiaohe, Qianjin           | 2014 | Hap_9  | -        | JJJ  | 43.63N, 127.73E |
| YJ71   | <i>I. robusta</i>       | <i>P. quinquefolius</i> | Jilin, Yanbian, Wangqing, Daxinggou     | 2014 | Hap_8  | -        | JYW  | 43.42N, 129.66E |
| YJ76   | <i>I. robusta</i>       | <i>P. quinquefolius</i> | Jilin, Yanbian, Wangqing, Daxinggou     | 2014 | Hap_9  | -        | JYW  | 43.42N, 129.66E |
| YJ78   | <i>I. robusta</i>       | <i>P. quinquefolius</i> | Jilin, Yanbian, Wangqing, Daxinggou     | 2014 | Hap_9  | -        | JYW  | 43.42N, 129.66E |
| YJ79   | <i>I. robusta</i>       | <i>P. quinquefolius</i> | Jilin, Yanbian, Wangqing, Daxinggou     | 2014 | Hap_9  | -        | JYW  | 43.42N, 129.66E |
| YJ83   | <i>I. mors-panacis</i>  | <i>P. quinquefolius</i> | Jilin, Yanbian, Hunchun, Yangpao        | 2014 | Hap_3  | -        | JYH  | 42.90N, 130.50E |
| 11R1   | <i>I. communis</i>      | <i>P. ginseng</i>       | Jilin, Baishan, Changbai, Baoquanshan   | 2012 | Hap_1  | -        | JBC  | 41.52N, 127.46E |
| 11R7   | <i>I. communis</i>      | <i>P. ginseng</i>       | Jilin, Baishan, Changbai, Baoquanshan   | 2012 | Hap_1  | -        | JBC  | 41.52N, 127.46E |
| 11R8-2 | <i>I. changbaiensis</i> | <i>P. ginseng</i>       | Jilin, Baishan, Changbai, Baoquanshan   | 2012 | Hap_2  | MF350439 | JBC  | 41.52N, 127.46E |
| 11R9   | <i>I. mors-panacis</i>  | <i>P. ginseng</i>       | Jilin, Baishan, Changbai, Baoquanshan   | 2012 | Hap_3  | MF350450 | JBC  | 41.52N, 127.46E |
| 308-2  | <i>I. communis</i>      | <i>P. ginseng</i>       | Jilin, Baishan, Changbai, Baoquanshan   | 2012 | Hap_1  | -        | JBC  | 41.52N, 127.46E |
| 3S04   | <i>I. communis</i>      | <i>P. ginseng</i>       | Jilin, Baishan, Changbai, Baoquanshan   | 2012 | Hap_1  | -        | JBC  | 41.52N, 127.46E |
| 3S07   | <i>D. hordeicola</i>    | <i>P. ginseng</i>       | Jilin, Baishan, Changbai, Baoquanshan   | 2012 | Hap_4  | MF350455 | JBC  | 41.52N, 127.46E |
| 3S12   | <i>I. communis</i>      | <i>P. ginseng</i>       | Jilin, Baishan, Changbai, Baoquanshan   | 2012 | Hap_1  | -        | JBC  | 41.52N, 127.46E |
| 3S24   | <i>I. communis</i>      | <i>P. ginseng</i>       | Jilin, Baishan, Changbai, Baoquanshan   | 2012 | Hap_1  | -        | JBC  | 41.52N, 127.46E |
| 3S26   | <i>I. communis</i>      | <i>P. ginseng</i>       | Jilin, Baishan, Changbai, Baoquanshan   | 2012 | Hap_1  | -        | JBC  | 41.52N, 127.46E |
| 71R2   | <i>I. communis</i>      | <i>P. ginseng</i>       | Jilin, Baishan, Changbai, Baoquanshan   | 2012 | Hap_6  | MF350431 | JBC  | 41.52N, 127.46E |
| 71R7   | <i>I. robusta</i>       | <i>P. ginseng</i>       | Jilin, Baishan, Changbai, Baoquanshan   | 2012 | Hap_7  | MT043271 | JBC  | 41.52N, 127.46E |
| 73P1   | <i>I. communis</i>      | <i>P. ginseng</i>       | Jilin, Baishan, Changbai, Baoquanshan   | 2012 | Hap_1  | -        | JBC  | 41.52N, 127.46E |
| 73R4   | <i>I. communis</i>      | <i>P. ginseng</i>       | Jilin, Baishan, Changbai, Baoquanshan   | 2012 | Hap_1  | -        | JBC  | 41.52N, 127.46E |
| 74R2   | <i>I. communis</i>      | <i>P. ginseng</i>       | Jilin, Baishan, Changbai, Baoquanshan   | 2012 | Hap_1  | -        | JBC  | 41.52N, 127.46E |
| H110   | <i>I. robusta</i>       | <i>P. ginseng</i>       | Heilongjiang, Harbin, Tonghe, Fengshar  | 2013 | Hap_7  | -        | HHYT | 45.75N, 131.19E |
| H114   | <i>I. robusta</i>       | <i>P. ginseng</i>       | Heilongjiang, Harbin, Tonghe, Fengshar  | 2013 | Hap_8  | -        | HHYT | 45.75N, 131.19E |
| H201   | <i>I. robusta</i>       | <i>P. ginseng</i>       | Heilongjiang, Heihe, Beian, Tongbei     | 2013 | Hap_9  | -        | HHB  | 47.77N, 126.78E |
| H2022  | <i>I. robusta</i>       | <i>P. ginseng</i>       | Heilongjiang, Heihe, Beian, Tongbei     | 2013 | Hap_9  | -        | HHB  | 47.77N, 126.78E |
| H203   | <i>I. robusta</i>       | <i>P. ginseng</i>       | Heilongjiang, Heihe, Beian, Tongbei     | 2013 | Hap_9  | -        | HHB  | 47.77N, 126.78E |
| H2062  | <i>I. robusta</i>       | <i>P. ginseng</i>       | Heilongjiang, Heihe, Beian, Tongbei     | 2013 | Hap_9  | -        | HHB  | 47.77N, 126.78E |
| H207   | <i>I. robusta</i>       | <i>P. ginseng</i>       | Heilongjiang, Heihe, Beian, Tongbei     | 2013 | Hap_9  | MF350434 | HHB  | 47.77N, 126.78E |
| H2073  | <i>I. communis</i>      | <i>P. ginseng</i>       | Heilongjiang, Heihe, Beian, Tongbei     | 2013 | Hap_1  | MF350434 | HHB  | 47.77N, 126.78E |
| H209   | <i>I. robusta</i>       | <i>P. ginseng</i>       | Heilongjiang, Heihe, Beian, Tongbei     | 2013 | Hap_9  | -        | HHB  | 47.77N, 126.78E |
| H301   | <i>I. robusta</i>       | <i>P. ginseng</i>       | Heilongjiang, Qitaihe, Qiezihe, Tieshan | 2013 | Hap_9  | -        | HQQ  | 45.75N, 131.19E |
| H302   | <i>I. robusta</i>       | <i>P. ginseng</i>       | Heilongjiang, Qitaihe, Qiezihe, Tieshan | 2013 | Hap_9  | -        | HQQ  | 45.75N, 131.19E |
| H310   | <i>I. robusta</i>       | <i>P. ginseng</i>       | Heilongjiang, Qitaihe, Qiezihe, Tieshan | 2013 | Hap_11 | -        | HQQ  | 45.75N, 131.19E |
| J101   | <i>I. communis</i>      | <i>P. ginseng</i>       | Jilin, Baishan, Fusong, Beigang         | 2013 | Hap_1  | MF350432 | JBF  | 42.42N, 127.54E |

|        |                           |                      |                                         |      |        |          |      |                 |
|--------|---------------------------|----------------------|-----------------------------------------|------|--------|----------|------|-----------------|
| J103   | <i>I. communis</i>        | <i>P. ginseng</i>    | Jilin, Baishan, Fusong, Beigang         | 2013 | Hap_1  | -        | JBF  | 42.42N, 127.54E |
| J104   | <i>I. communis</i>        | <i>P. ginseng</i>    | Jilin, Baishan, Fusong, Beigang         | 2013 | Hap_12 | MT043276 | JBF  | 42.42N, 127.54E |
| J105   | <i>I. robusta</i>         | <i>P. ginseng</i>    | Jilin, Baishan, Fusong, Beigang         | 2013 | Hap_9  | -        | JBF  | 42.42N, 127.54E |
| J107   | <i>I. robusta</i>         | <i>P. ginseng</i>    | Jilin, Baishan, Fusong, Beigang         | 2013 | Hap_9  | -        | JBF  | 42.42N, 127.54E |
| J1073  | <i>I. communis</i>        | <i>P. ginseng</i>    | Jilin, Baishan, Fusong, Beigang         | 2013 | Hap_1  | -        | JBF  | 42.42N, 127.54E |
| J108   | <i>I. communis</i>        | <i>P. ginseng</i>    | Jilin, Baishan, Fusong, Beigang         | 2013 | Hap_1  | -        | JBF  | 42.42N, 127.54E |
| J108-2 | <i>I. robusta</i>         | <i>P. ginseng</i>    | Jilin, Baishan, Fusong, Beigang         | 2013 | Hap_9  | -        | JBF  | 42.42N, 127.54E |
| J109   | <i>I. communis</i>        | <i>P. ginseng</i>    | Jilin, Baishan, Fusong, Beigang         | 2013 | Hap_1  | -        | JBF  | 42.42N, 127.54E |
| J2072  | <i>I. communis</i>        | <i>P. ginseng</i>    | Jilin, Baishan, Fusong, Xigang          | 2013 | Hap_1  | -        | JBF  | 42.42N, 127.54E |
| J2102  | <i>I. communis</i>        | <i>P. ginseng</i>    | Jilin, Baishan, Fusong, Xigang          | 2013 | Hap_1  | -        | JBF  | 42.42N, 127.54E |
| J214   | <i>I. communis</i>        | <i>P. ginseng</i>    | Jilin, Baishan, Fusong, Xigang          | 2013 | Hap_1  | -        | JBF  | 42.42N, 127.54E |
| J302   | <i>I. communis</i>        | <i>P. ginseng</i>    | Jilin, Baishan, Changbai, Malugou       | 2013 | Hap_1  | -        | JBCM | 41.44N, 128.21E |
| J3032  | <i>I. robusta</i>         | <i>P. ginseng</i>    | Jilin, Baishan, Changbai, Malugou       | 2013 | Hap_9  | -        | JBCM | 41.44N, 128.21E |
| J304   | <i>I. robusta</i>         | <i>P. ginseng</i>    | Jilin, Baishan, Changbai, Malugou       | 2013 | Hap_9  | -        | JBCM | 41.44N, 128.21E |
| J305   | <i>I. communis</i>        | <i>P. ginseng</i>    | Jilin, Baishan, Changbai, Malugou       | 2013 | Hap_1  | -        | JBCM | 41.44N, 128.21E |
| J3093  | <i>I. communis</i>        | <i>P. ginseng</i>    | Jilin, Baishan, Changbai, Malugou       | 2013 | Hap_1  | -        | JBCM | 41.44N, 128.21E |
| J3102  | <i>I. communis</i>        | <i>P. ginseng</i>    | Jilin, Baishan, Changbai, Malugou       | 2013 | Hap_1  | -        | JBCM | 41.44N, 128.21E |
| J322   | <i>Ilyonectria</i> sp.    | <i>Panax ginseng</i> | Jilin, Baishan, Changbai, Malugou       | 2013 | Hap_13 | MT043270 | JBCM | 41.44N, 128.21E |
| J410   | <i>I. communis</i>        | <i>P. ginseng</i>    | Jilin, Baishan, Changbai, Shisidaogou   | 2013 | Hap_1  | MF350430 | JBC  | 41.52N, 127.46E |
| J421   | <i>I. communis</i>        | <i>P. ginseng</i>    | Jilin, Baishan, Changbai, Shisidaogou   | 2013 | Hap_1  | -        | JBC  | 41.52N, 127.46E |
| J5032  | <i>I. robusta</i>         | <i>P. ginseng</i>    | Jilin, Jilin, Jiaohe, Huangsongdian     | 2013 | Hap_9  | -        | JJJ  | 43.63N, 127.73E |
| J506   | <i>I. robusta</i>         | <i>P. ginseng</i>    | Jilin, Jilin, Jiaohe, Huangsongdian     | 2013 | Hap_9  | -        | JJJ  | 43.63N, 127.73E |
| H309   | <i>I. qitaiheensis</i>    | <i>P. ginseng</i>    | Heilongjiang, Qitaihe, Qiezihe, Tieshan | 2013 | Hap_10 | MF350445 | HQQ  | 45.75N, 131.19E |
| J9191  | <i>I. qitaiheensis</i>    | <i>P. ginseng</i>    | Jilin, Tonghua, Jian, Toudao            | 2013 | Hap_16 | MF350446 | JTJ  | 41.51N, 125.88E |
| J601   | <i>I. communis</i>        | <i>P. ginseng</i>    | Jilin, Yanbian, Antu, Songjiang         | 2013 | Hap_1  | -        | JYAD | 42.58N, 128.33E |
| J606   | <i>I. robusta</i>         | <i>P. ginseng</i>    | Jilin, Yanbian, Antu, Songjiang         | 2013 | Hap_11 | -        | JYAD | 42.58N, 128.33E |
| J608   | <i>I. robusta</i>         | <i>P. ginseng</i>    | Jilin, Yanbian, Antu, Songjiang         | 2013 | Hap_9  | -        | JYAD | 42.58N, 128.33E |
| J610   | <i>I. robusta</i>         | <i>P. ginseng</i>    | Jilin, Yanbian, Antu, Songjiang         | 2013 | Hap_9  | -        | JYAD | 42.58N, 128.33E |
| J701   | <i>I. communis</i>        | <i>P. ginseng</i>    | Jilin, Yanbian, Antu, Xinhexiang        | 2013 | Hap_1  | -        | JYAD | 42.58N, 128.33E |
| J702   | <i>I. robusta</i>         | <i>P. ginseng</i>    | Jilin, Yanbian, Antu, Xinhexiang        | 2013 | Hap_11 | -        | JYAD | 42.58N, 128.33E |
| J703   | <i>I. robusta</i>         | <i>P. ginseng</i>    | Jilin, Yanbian, Antu, Xinhexiang        | 2013 | Hap_11 | -        | JYAD | 42.58N, 128.33E |
| J706   | <i>I. robusta</i>         | <i>P. ginseng</i>    | Jilin, Yanbian, Antu, Xinhexiang        | 2013 | Hap_9  | -        | JYAD | 42.58N, 128.33E |
| J709   | <i>I. communis</i>        | <i>P. ginseng</i>    | Jilin, Yanbian, Antu, Xinhexiang        | 2013 | Hap_1  | -        | JYAD | 42.58N, 128.33E |
| J710   | <i>I. communis</i>        | <i>P. ginseng</i>    | Jilin, Yanbian, Antu, Xinhexiang        | 2013 | Hap_1  | MF350435 | JYAD | 42.58N, 128.33E |
| J711   | <i>Dactylonectria</i> sp. | <i>P. ginseng</i>    | Jilin, Yanbian, Antu, Xinhexiang        | 2013 | Hap_14 | MF350452 | JYAD | 42.58N, 128.33E |

|        |                           |                         |                                    |      |        |          |      |                 |
|--------|---------------------------|-------------------------|------------------------------------|------|--------|----------|------|-----------------|
| J713   | <i>I. robusta</i>         | <i>P. ginseng</i>       | Jilin, Yanbian, Antu, Xinhexiang   | 2013 | Hap_8  | -        | JYAD | 42.58N, 128.33E |
| J801   | <i>I. robusta</i>         | <i>P. ginseng</i>       | Jilin, Yanbian, Hunchun, Hadamen   | 2013 | Hap_8  | -        | JYH  | 42.93N, 130.49E |
| J802   | <i>I. robusta</i>         | <i>P. ginseng</i>       | Jilin, Yanbian, Hunchun, Hadamen   | 2013 | Hap_9  | -        | JYH  | 42.93N, 130.49E |
| J803   | <i>I. robusta</i>         | <i>P. ginseng</i>       | Jilin, Yanbian, Hunchun, Hadamen   | 2013 | Hap_9  | -        | JYH  | 42.93N, 130.49E |
| J804   | <i>I. robusta</i>         | <i>P. ginseng</i>       | Jilin, Yanbian, Hunchun, Hadamen   | 2013 | Hap_11 | -        | JYH  | 42.93N, 130.49E |
| J811   | <i>I. robusta</i>         | <i>P. ginseng</i>       | Jilin, Yanbian, Hunchun, Hadamen   | 2013 | Hap_11 | -        | JYH  | 42.93N, 130.49E |
| J812   | <i>I. robusta</i>         | <i>P. ginseng</i>       | Jilin, Yanbian, Hunchun, Hadamen   | 2013 | Hap_9  | -        | JYH  | 42.93N, 130.49E |
| J901   | <i>I. robusta</i>         | <i>P. ginseng</i>       | Jilin, Tonghua, Jian, Toudao       | 2013 | Hap_9  | -        | JTJ  | 41.51N, 125.88E |
| J903   | <i>I. robusta</i>         | <i>P. ginseng</i>       | Jilin, Tonghua, Jian, Toudao       | 2013 | Hap_9  | -        | JTJ  | 41.51N, 125.88E |
| J904   | <i>I. robusta</i>         | <i>P. ginseng</i>       | Jilin, Tonghua, Jian, Toudao       | 2013 | Hap_9  | -        | JTJ  | 41.51N, 125.88E |
| J905   | <i>I. robusta</i>         | <i>P. ginseng</i>       | Jilin, Tonghua, Jian, Toudao       | 2013 | Hap_9  | -        | JTJ  | 41.51N, 125.88E |
| J906   | <i>I. robusta</i>         | <i>P. ginseng</i>       | Jilin, Tonghua, Jian, Toudao       | 2013 | Hap_9  | KM015299 | JTJ  | 41.51N, 125.88E |
| J907   | <i>I. robusta</i>         | <i>P. ginseng</i>       | Jilin, Tonghua, Jian, Toudao       | 2013 | Hap_9  | -        | JTJ  | 41.51N, 125.88E |
| J909   | <i>I. robusta</i>         | <i>P. ginseng</i>       | Jilin, Tonghua, Jian, Toudao       | 2013 | Hap_9  | -        | JTJ  | 41.51N, 125.88E |
| J913   | <i>I. robusta</i>         | <i>P. ginseng</i>       | Jilin, Tonghua, Jian, Toudao       | 2013 | Hap_7  | -        | JTJ  | 41.51N, 125.88E |
| J914   | <i>I. robusta</i>         | <i>P. ginseng</i>       | Jilin, Tonghua, Jian, Toudao       | 2013 | Hap_9  | -        | JTJ  | 41.51N, 125.88E |
| J915   | <i>I. robusta</i>         | <i>P. ginseng</i>       | Jilin, Tonghua, Jian, Toudao       | 2013 | Hap_9  | -        | JTJ  | 41.51N, 125.88E |
| J917   | <i>I. robusta</i>         | <i>P. ginseng</i>       | Jilin, Tonghua, Jian, Toudao       | 2013 | Hap_15 | MT043272 | JTJ  | 41.51N, 125.88E |
| J918   | <i>I. robusta</i>         | <i>P. ginseng</i>       | Jilin, Tonghua, Jian, Toudao       | 2013 | Hap_9  | -        | JTJ  | 41.51N, 125.88E |
| J91933 | <i>I. robusta</i>         | <i>P. ginseng</i>       | Jilin, Tonghua, Jian, Toudao       | 2013 | Hap_9  | -        | JTJ  | 41.51N, 125.88E |
| J922   | <i>I. robusta</i>         | <i>P. ginseng</i>       | Jilin, Tonghua, Jian, Toudao       | 2013 | Hap_9  | -        | JTJ  | 41.51N, 125.88E |
| J923   | <i>I. robusta</i>         | <i>P. ginseng</i>       | Jilin, Tonghua, Jian, Toudao       | 2013 | Hap_9  | -        | JTJ  | 41.51N, 125.88E |
| YH11   | <i>I. robusta</i>         | <i>P. quinquefolius</i> | Heilongjiang, Harbin, Yilan, Yilan | 2014 | Hap_8  | -        | HHYT | 46.32N, 129.56E |
| YH1101 | <i>I. robusta</i>         | <i>P. quinquefolius</i> | Heilongjiang, Harbin, Yilan, Yilan | 2014 | Hap_8  | -        | HHYT | 46.32N, 129.56E |
| YH1102 | <i>I. communis</i>        | <i>P. quinquefolius</i> | Heilongjiang, Harbin, Yilan, Yilan | 2014 | Hap_1  | -        | HHYT | 46.32N, 129.56E |
| YH111  | <i>I. communis</i>        | <i>P. quinquefolius</i> | Heilongjiang, Harbin, Yilan, Yilan | 2014 | Hap_6  | -        | HHYT | 46.32N, 129.56E |
| YH112  | <i>I. robusta</i>         | <i>P. quinquefolius</i> | Heilongjiang, Harbin, Yilan, Yilan | 2014 | Hap_8  | -        | HHYT | 46.32N, 129.56E |
| YH113  | <i>I. robusta</i>         | <i>P. quinquefolius</i> | Heilongjiang, Harbin, Yilan, Yilan | 2014 | Hap_8  | -        | HHYT | 46.32N, 129.56E |
| YH114  | <i>I. robusta</i>         | <i>P. quinquefolius</i> | Heilongjiang, Harbin, Yilan, Yilan | 2014 | Hap_8  | -        | HHYT | 46.32N, 129.56E |
| YJ110  | <i>Dactylonectria</i> sp. | <i>P. quinquefolius</i> | Jilin, Baishan, Fusong Beigang     | 2014 | Hap_14 | -        | JBF  | 42.42N, 127.54E |
| YJ112  | <i>I. mors-panacis</i>    | <i>P. quinquefolius</i> | Jilin, Baishan, Fusong Beigang     | 2014 | Hap_3  | -        | JBF  | 42.42N, 127.54E |
| YJ115  | <i>I. mors-panacis</i>    | <i>P. quinquefolius</i> | Jilin, Baishan, Fusong Beigang     | 2014 | Hap_3  | -        | JBF  | 42.42N, 127.54E |
| YJ117  | <i>I. mors-panacis</i>    | <i>P. quinquefolius</i> | Jilin, Baishan, Fusong Beigang     | 2014 | Hap_3  | -        | JBF  | 42.42N, 127.54E |
| YJ210  | <i>I. robusta</i>         | <i>P. quinquefolius</i> | Jilin, Baishan, Fusong, Lushuihe   | 2014 | Hap_9  | -        | JBF  | 42.42N, 127.54E |
| YJ211  | <i>I. communis</i>        | <i>P. quinquefolius</i> | Jilin, Baishan, Fusong, Lushuihe   | 2014 | Hap_1  | -        | JBF  | 42.42N, 127.54E |

|        |                           |                         |                                      |      |        |          |      |                 |
|--------|---------------------------|-------------------------|--------------------------------------|------|--------|----------|------|-----------------|
| YJ212  | <i>Dactylonectria</i> sp. | <i>P. quinquefolius</i> | Jilin, Baishan, Fusong, Lushuihe     | 2014 | Hap_14 | -        | JBF  | 42.42N, 127.54E |
| YJ310  | <i>I. communis</i>        | <i>P. quinquefolius</i> | Jilin, Baishan, Changbai, Malugou    | 2014 | Hap_1  | -        | JBCM | 41.44N, 128.21E |
| YJ312  | <i>I. communis</i>        | <i>P. quinquefolius</i> | Jilin, Baishan, Changbai, Malugou    | 2014 | Hap_1  | -        | JBCM | 41.44N, 128.21E |
| YJ315  | <i>I. communis</i>        | <i>P. quinquefolius</i> | Jilin, Baishan, Changbai, Malugou    | 2014 | Hap_1  | -        | JBCM | 41.44N, 128.21E |
| YJ322  | <i>I. robusta</i>         | <i>P. quinquefolius</i> | Jilin, Baishan, Changbai, Malugou    | 2014 | Hap_11 | -        | JBCM | 41.44N, 128.21E |
| YJ327  | <i>I. mors-panacis</i>    | <i>P. quinquefolius</i> | Jilin, Baishan, Changbai, Malugou    | 2014 | Hap_3  | -        | JBCM | 41.44N, 128.21E |
| YJ3281 | <i>I. mors-panacis</i>    | <i>P. quinquefolius</i> | Jilin, Baishan, Changbai, Malugou    | 2014 | Hap_3  | -        | JBCM | 41.44N, 128.21E |
| YJ410  | <i>I. communis</i>        | <i>P. quinquefolius</i> | Jilin, Baishan, Linjiang, Dongbeicha | 2014 | Hap_1  | -        | JBL  | 41.74N, 127.29E |
| YJ4113 | <i>I. communis</i>        | <i>P. quinquefolius</i> | Jilin, Baishan, Linjiang, Dongbeicha | 2014 | Hap_1  | -        | JBL  | 41.74N, 127.29E |
| YJ4114 | <i>I. communis</i>        | <i>P. quinquefolius</i> | Jilin, Baishan, Linjiang, Dongbeicha | 2014 | Hap_1  | -        | JBL  | 41.74N, 127.29E |
| YJ4116 | <i>I. communis</i>        | <i>P. quinquefolius</i> | Jilin, Baishan, Linjiang, Dongbeicha | 2014 | Hap_1  | -        | JBL  | 41.74N, 127.29E |
| YJ4117 | <i>I. communis</i>        | <i>P. quinquefolius</i> | Jilin, Baishan, Linjiang, Dongbeicha | 2014 | Hap_1  | -        | JBL  | 41.74N, 127.29E |
| YJ4118 | <i>I. communis</i>        | <i>P. quinquefolius</i> | Jilin, Baishan, Linjiang, Dongbeicha | 2014 | Hap_1  | -        | JBL  | 41.74N, 127.29E |
| YJ413  | <i>I. mors-panacis</i>    | <i>P. quinquefolius</i> | Jilin, Baishan, Linjiang, Dongbeicha | 2014 | Hap_3  | -        | JBL  | 41.74N, 127.29E |
| YJ415  | <i>I. communis</i>        | <i>P. quinquefolius</i> | Jilin, Baishan, Linjiang, Dongbeicha | 2014 | Hap_1  | -        | JBL  | 41.74N, 127.29E |
| YJ417  | <i>I. communis</i>        | <i>P. quinquefolius</i> | Jilin, Baishan, Linjiang, Dongbeicha | 2014 | Hap_1  | -        | JBL  | 41.74N, 127.29E |
| YJ418  | <i>I. communis</i>        | <i>P. quinquefolius</i> | Jilin, Baishan, Linjiang, Dongbeicha | 2014 | Hap_1  | -        | JBL  | 41.74N, 127.29E |
| YJ419  | <i>I. communis</i>        | <i>P. quinquefolius</i> | Jilin, Baishan, Linjiang, Dongbeicha | 2014 | Hap_1  | -        | JBL  | 41.74N, 127.29E |
| YJ423  | <i>I. mors-panacis</i>    | <i>P. quinquefolius</i> | Jilin, Baishan, Linjiang, Dongbeicha | 2014 | Hap_3  | -        | JBL  | 41.74N, 127.29E |
| YJ424  | <i>I. mors-panacis</i>    | <i>P. quinquefolius</i> | Jilin, Baishan, Linjiang, Dongbeicha | 2014 | Hap_3  | -        | JBL  | 41.74N, 127.29E |
| YJ4251 | <i>I. mors-panacis</i>    | <i>P. quinquefolius</i> | Jilin, Baishan, Linjiang, Dongbeicha | 2014 | Hap_3  | -        | JBL  | 41.74N, 127.29E |
| YJ4252 | <i>I. mors-panacis</i>    | <i>P. quinquefolius</i> | Jilin, Baishan, Linjiang, Dongbeicha | 2014 | Hap_3  | -        | JBL  | 41.74N, 127.29E |
| YJ510  | <i>I. robusta</i>         | <i>P. quinquefolius</i> | Jilin, Jilin, Jiaohe, Qianjin        | 2014 | Hap_20 | MT043273 | JJJ  | 43.63N, 127.73E |
| YJ511  | <i>I. mors-panacis</i>    | <i>P. quinquefolius</i> | Jilin, Jilin, Jiaohe, Qianjin        | 2014 | Hap_3  | -        | JJJ  | 43.63N, 127.73E |
| YJ513  | <i>I. robusta</i>         | <i>P. quinquefolius</i> | Jilin, Jilin, Jiaohe, Qianjin        | 2014 | Hap_11 | -        | JJJ  | 43.63N, 127.73E |
| YJ5151 | <i>I. robusta</i>         | <i>P. quinquefolius</i> | Jilin, Jilin, Jiaohe, Qianjin        | 2014 | Hap_9  | -        | JJJ  | 43.63N, 127.73E |
| YJ5152 | <i>Dactylonectria</i> sp. | <i>P. quinquefolius</i> | Jilin, Jilin, Jiaohe, Qianjin        | 2014 | Hap_14 | -        | JJJ  | 43.63N, 127.73E |
| YJ612  | <i>I. mors-panacis</i>    | <i>P. quinquefolius</i> | Jilin, Yanbian, Dunhua, Dapuchaihe   | 2014 | Hap_3  | -        | JYAD | 42.88N, 128.03E |
| YJ6171 | <i>I. mors-panacis</i>    | <i>P. quinquefolius</i> | Jilin, Yanbian, Dunhua, Dapuchaihe   | 2014 | Hap_3  | -        | JYAD | 42.88N, 128.03E |
| YJ710  | <i>I. robusta</i>         | <i>P. quinquefolius</i> | Jilin, Yanbian, Wangqing, Daxinggou  | 2014 | Hap_8  | -        | JYW  | 43.42N, 129.66E |
| YJ711  | <i>I. robusta</i>         | <i>P. quinquefolius</i> | Jilin, Yanbian, Wangqing, Daxinggou  | 2014 | Hap_7  | -        | JYW  | 43.42N, 129.66E |

"-" means that the isolate shares the same sequences with other isolates belonging to the same haplotype. Therefore at least one GenBank accession number was provided for each haplotype.

**Table S2. CLF isolates used in worldwide genetic diversity and population structure analyses**

| Isolate number | Species                    | Host                                    | Location                   | GenBank accession number | Population code |
|----------------|----------------------------|-----------------------------------------|----------------------------|--------------------------|-----------------|
| CBS 321.34     | <i>Ilyonectria robusta</i> | <i>Loroglossum hircinum</i>             | Tunis, Tunisia             | JF735517                 | Africa          |
| CBS 308.35     | <i>I. robusta</i>          | <i>Panax quinquefolium</i>              | Ontario, Canada            | JF735518                 | Ameirica/Canada |
| CBS 773.83     | <i>I. robusta</i>          | Water, in aquarium with <i>Anodonta</i> | Utrecht, Netherlands       | JF735519                 | Europe          |
| CBS 605.92     | <i>I. robusta</i>          | <i>Tilia petiolaris</i>                 | Hamburg, Germany           | JF735520                 | Europe          |
| CBS 117814     | <i>I. robusta</i>          | <i>Quercus</i> sp.                      | Patzmannsdorf, Austria     | JF735521                 | Oceania         |
| CBS 117815     | <i>I. robusta</i>          | <i>Quercus</i> sp.                      | Patzmannsdorf, Austria     | JF735522                 | Oceania         |
| CBS 117818     | <i>I. robusta</i>          | <i>Quercus</i> sp.                      | Patzmannsdorf, Austria     | JF735523                 | Oceania         |
| CBS 117820     | <i>I. robusta</i>          | <i>Quercus robur</i>                    | Niederweiden, Austria      | JF735524                 | Oceania         |
| CBS 117821     | <i>I. robusta</i>          | <i>Quercus robur</i>                    | Niederweiden, Austria      | JF735525                 | Oceania         |
| CBS 117822     | <i>I. robusta</i>          | <i>Quercus robur</i>                    | Niederweiden, Austria      | JF735526                 | Oceania         |
| CBS 117823     | <i>I. robusta</i>          | <i>Quercus robur</i>                    | Niederweiden, Austria      | JF735527                 | Oceania         |
| CD1666         | <i>I. robusta</i>          | <i>Panax quinquefolium</i>              | Nova Scotia, Canada        | JF735528                 | Ameirica/Canada |
| CPC 13532      | <i>I. robusta</i>          | <i>Prunus cerasus</i>                   | Ontario, Canada            | JF735529                 | Ameirica        |
| Cy23           | <i>I. robusta</i>          | <i>Vitis</i> sp.                        | Ribatejo e Oeste, Portugal | JF735530                 | Europe          |
| Cy158          | <i>I. robusta</i>          | <i>Vitis vinifera</i>                   | Lamego, Cambres, Portugal  | JF735531                 | Europe          |
| CBS 129084     | <i>I. robusta</i>          | <i>Vitis vinifera</i>                   | Mon ção, Portugal          | JF735532                 | Europe          |
| Cy231          | <i>I. robusta</i>          | <i>Thymus</i> sp.                       | Lisbon, Portugal           | JF735533                 | Europe          |
| 10-K-TR-3      | <i>I. robusta</i>          | <i>Actinidia chinensis</i>              | Turkey                     | JQ860004                 | Europe          |
| TRR-2          | <i>I. robusta</i>          | <i>Actinidia chinensis</i>              | Turkey                     | JQ860005                 | Europe          |
| Cyl 16         | <i>I. robusta</i>          | <i>Eriobotrya japonica</i>              | Spain                      | KC514078                 | Europe          |
| Cy9UFSM        | <i>I. robusta</i>          | <i>Vitis vinifera</i>                   | Southern Brazil            | KF633172                 | Ameirica        |
| ACK-10271      | <i>I. robusta</i>          | <i>Aconitum kongboense</i>              | Tibet, China               | KJ710516                 | Asia            |
| ACK-10272      | <i>I. robusta</i>          | <i>Aconitum kongboense</i>              | Tibet, China               | KJ710517                 | Asia            |
| Cyl131         | <i>I. robusta</i>          | <i>Malus pumila</i>                     | South Tyrol, Italy         | KP823902                 | Europe          |
| Cy-FO-217      | <i>I. robusta</i>          | Forest nurseries                        | Spain                      | KX709582                 | Europe          |
| EFA 184        | <i>I. robusta</i>          | <i>Vitis vinifera</i>                   | unknown/Spain              | MF471467                 | Europe          |
| UFAH00042      | <i>I. robusta</i>          | <i>Rubus glaucus</i>                    | Ecuador                    | MG852007                 | Ameirica        |
| BV-816         | <i>I. robusta</i>          | <i>Vitis vinifera</i>                   | Spain                      | MH229866                 | Europe          |
| GIHF-156       | <i>I. robusta</i>          | <i>Vitis vinifera</i>                   | Spain                      | MH229867                 | Europe          |
| ICMP14133      | <i>I. robusta</i>          | <i>Vitis vinifera</i>                   | unknown/New Zealand        | MH553544                 | Oceania         |

|            |                        |                         |                  |          |                 |
|------------|------------------------|-------------------------|------------------|----------|-----------------|
| 8916       | <i>I. robusta</i>      | Stone fruit             | South Africa     | MK765797 | Africa          |
| JBL LJ-3   | <i>I. robusta</i>      | <i>P. ginseng</i>       | Northeast, China | MN101765 | Asia/Northeast  |
| JYDDH-1    | <i>I. robusta</i>      | <i>P. ginseng</i>       | Northeast, China | MN101766 | Asia/Northeast  |
| JYAED-2    | <i>I. robusta</i>      | <i>P. ginseng</i>       | Northeast, China | MN101767 | Asia/Northeast  |
| JJHHD-6    | <i>I. robusta</i>      | <i>P. ginseng</i>       | Northeast, China | MN101768 | Asia/Northeast  |
| HSSSL-8    | <i>I. robusta</i>      | <i>P. ginseng</i>       | Northeast, China | MN101769 | Asia/Northeast  |
| HYTTL-4    | <i>I. robusta</i>      | <i>P. ginseng</i>       | Northeast, China | MN101770 | Asia/Northeast  |
| JYHCH-1    | <i>I. robusta</i>      | <i>P. ginseng</i>       | Northeast, China | MN101771 | Asia/Northeast  |
| JBCML-3    | <i>I. robusta</i>      | <i>P. ginseng</i>       | Northeast, China | MN101772 | Asia/Northeast  |
| JTJYL-11   | <i>I. robusta</i>      | <i>P. ginseng</i>       | Northeast, China | MN101773 | Asia/Northeast  |
| CBS 120359 | <i>I. mors-panacis</i> | <i>P. quinquefolius</i> | Ontario, Canada  | JF735547 | Ameirica/Canada |
| CBS 120361 | <i>I. mors-panacis</i> | <i>P. quinquefolius</i> | Ontario, Canada  | JF735548 | Ameirica/Canada |
| CBS 120364 | <i>I. mors-panacis</i> | <i>P. quinquefolius</i> | Ontario, Canada  | JF735549 | Ameirica/Canada |
| CBS 120365 | <i>I. mors-panacis</i> | <i>P. quinquefolius</i> | Ontario, Canada  | JF735550 | Ameirica/Canada |
| CBS 120366 | <i>I. mors-panacis</i> | <i>P. quinquefolius</i> | Ontario, Canada  | JF735551 | Ameirica/Canada |
| CBS 120367 | <i>I. mors-panacis</i> | <i>P. quinquefolius</i> | Ontario, Canada  | JF735552 | Ameirica/Canada |
| CBS 120368 | <i>I. mors-panacis</i> | <i>P. quinquefolius</i> | Ontario, Canada  | JF735553 | Ameirica/Canada |
| CBS 120369 | <i>I. mors-panacis</i> | <i>P. quinquefolius</i> | Ontario, Canada  | JF735554 | Ameirica/Canada |
| CPC 13535  | <i>I. mors-panacis</i> | <i>P. quinquefolius</i> | Ontario, Canada  | JF735555 | Ameirica/Canada |
| CPC 13537  | <i>I. mors-panacis</i> | <i>P. quinquefolius</i> | Ontario, Canada  | JF735556 | Ameirica/Canada |
| CBS 306.35 | <i>I. mors-panacis</i> | <i>P. quinquefolius</i> | Ontario, Canada  | JF735557 | Ameirica/Canada |
| CBS 307.35 | <i>I. mors-panacis</i> | <i>P. quinquefolius</i> | Ontario, Canada  | JF735558 | Ameirica/Canada |
| CBS 124662 | <i>I. mors-panacis</i> | <i>P. ginseng</i>       | Nagano, Japan    | JF735559 | Japan           |
| FG003      | <i>I. mors-panacis</i> | <i>P. notoginseng</i>   | Yunnan, China    | MK270539 | Yunnan          |
| FG004      | <i>I. mors-panacis</i> | <i>P. notoginseng</i>   | Yunnan, China    | MK270540 | Yunnan          |
| FG009      | <i>I. mors-panacis</i> | <i>P. notoginseng</i>   | Yunnan, China    | MK270545 | Yunnan          |
| FG010      | <i>I. mors-panacis</i> | <i>P. notoginseng</i>   | Yunnan, China    | MK270546 | Yunnan          |
| FG011      | <i>I. mors-panacis</i> | <i>P. notoginseng</i>   | Yunnan, China    | MK270547 | Yunnan          |
| FG012      | <i>I. mors-panacis</i> | <i>P. notoginseng</i>   | Yunnan, China    | MK270548 | Yunnan          |
| FG013      | <i>I. mors-panacis</i> | <i>P. notoginseng</i>   | Yunnan, China    | MK270549 | Yunnan          |
| FG014      | <i>I. mors-panacis</i> | <i>P. notoginseng</i>   | Yunnan, China    | MK270550 | Yunnan          |
| FG015      | <i>I. mors-panacis</i> | <i>P. notoginseng</i>   | Yunnan, China    | MK270551 | Yunnan          |



|          |                        |                         |                  |          |           |
|----------|------------------------|-------------------------|------------------|----------|-----------|
| FG016    | <i>I. mors-panacis</i> | <i>P. notoginseng</i>   | Yunnan, China    | MK270552 | Yunnan    |
| FG018    | <i>I. mors-panacis</i> | <i>P. notoginseng</i>   | Yunnan, China    | MK270554 | Yunnan    |
| FG023    | <i>I. mors-panacis</i> | <i>P. notoginseng</i>   | Yunnan, China    | MK270559 | Yunnan    |
| FG024    | <i>I. mors-panacis</i> | <i>P. notoginseng</i>   | Yunnan, China    | MK270560 | Yunnan    |
| FG025    | <i>I. mors-panacis</i> | <i>P. notoginseng</i>   | Yunnan, China    | MK270561 | Yunnan    |
| FG027    | <i>I. mors-panacis</i> | <i>P. notoginseng</i>   | Yunnan, China    | MK270563 | Yunnan    |
| FG028    | <i>I. mors-panacis</i> | <i>P. notoginseng</i>   | Yunnan, China    | MK270564 | Yunnan    |
| FG030    | <i>I. mors-panacis</i> | <i>P. notoginseng</i>   | Yunnan, China    | MK270566 | Yunnan    |
| FG031    | <i>I. mors-panacis</i> | <i>P. notoginseng</i>   | Yunnan, China    | MK270567 | Yunnan    |
| FG032    | <i>I. mors-panacis</i> | <i>P. notoginseng</i>   | Yunnan, China    | MK270568 | Yunnan    |
| FG033    | <i>I. mors-panacis</i> | <i>P. notoginseng</i>   | Yunnan, China    | MK270569 | Yunnan    |
| FG035    | <i>I. mors-panacis</i> | <i>P. notoginseng</i>   | Yunnan, China    | MK270571 | Yunnan    |
| FG036    | <i>I. mors-panacis</i> | <i>P. notoginseng</i>   | Yunnan, China    | MK270572 | Yunnan    |
| JYHHC-6  | <i>I. mors-panacis</i> | <i>P. ginseng</i>       | Northeast, China | MN101774 | Northeast |
| JTJJA-1  | <i>I. mors-panacis</i> | <i>P. ginseng</i>       | Northeast, China | MN101775 | Northeast |
| JB MJ-c  | <i>I. mors-panacis</i> | <i>P. ginseng</i>       | Northeast, China | MN101776 | Northeast |
| JBFQY-4  | <i>I. mors-panacis</i> | <i>P. ginseng</i>       | Northeast, China | MN101777 | Northeast |
| SQPC-3   | <i>I. mors-panacis</i> | <i>P. notoginseng</i>   | Yunnan, China    | KU219938 | Yunnan    |
| SQPC-4   | <i>I. mors-panacis</i> | <i>P. notoginseng</i>   | Yunnan, China    | KU219939 | Yunnan    |
| XGD1b1-2 | <i>I. mors-panacis</i> | <i>P. quinquefolius</i> | Shandong, China  |          | Shandong  |
| OZTB7-1  | <i>I. mors-panacis</i> | <i>P. quinquefolius</i> | Shandong, China  |          | Shandong  |
| OZTB8-4  | <i>I. mors-panacis</i> | <i>P. quinquefolius</i> | Shandong, China  |          | Shandong  |
| OZT1-1-1 | <i>I. mors-panacis</i> | <i>P. quinquefolius</i> | Shandong, China  |          | Shandong  |
| OZT1-1-2 | <i>I. mors-panacis</i> | <i>P. quinquefolius</i> | Shandong, China  |          | Shandong  |
| OZT1-1-3 | <i>I. mors-panacis</i> | <i>P. quinquefolius</i> | Shandong, China  |          | Shandong  |
| OZT1-2-1 | <i>I. mors-panacis</i> | <i>P. quinquefolius</i> | Shandong, China  |          | Shandong  |
| OZT1-2-2 | <i>I. mors-panacis</i> | <i>P. quinquefolius</i> | Shandong, China  |          | Shandong  |
| OZT1-3-4 | <i>I. mors-panacis</i> | <i>P. quinquefolius</i> | Shandong, China  |          | Shandong  |
| OZT1-5-2 | <i>I. mors-panacis</i> | <i>P. quinquefolius</i> | Shandong, China  |          | Shandong  |
| OZT1-5-4 | <i>I. mors-panacis</i> | <i>P. quinquefolius</i> | Shandong, China  |          | Shandong  |
| OSC2-1-2 | <i>I. mors-panacis</i> | <i>P. quinquefolius</i> | Shandong, China  |          | Shandong  |
| OSC2-2-2 | <i>I. mors-panacis</i> | <i>P. quinquefolius</i> | Shandong, China  |          | Shandong  |
| OSC2-3-2 | <i>I. mors-panacis</i> | <i>P. quinquefolius</i> | Shandong, China  |          | Shandong  |

|          |                        |                         |                 |          |          |
|----------|------------------------|-------------------------|-----------------|----------|----------|
| OSC2-5-2 | <i>I. mors-panacis</i> | <i>P. quinquefolius</i> | Shandong, China |          | Shandong |
| OSC2-6-1 | <i>I. mors-panacis</i> | <i>P. quinquefolius</i> | Shandong, China |          | Shandong |
| OZTB7-3  | <i>I. mors-panacis</i> | <i>P. quinquefolius</i> | Shandong, China |          | Shandong |
| OQT11-3  | <i>I. mors-panacis</i> | <i>P. quinquefolius</i> | Shandong, China |          | Shandong |
| OZTB2-1  | <i>I. mors-panacis</i> | <i>P. quinquefolius</i> | Shandong, China |          | Shandong |
| OZTB3-3  | <i>I. mors-panacis</i> | <i>P. quinquefolius</i> | Shandong, China |          | Shandong |
| OZTB3-4  | <i>I. mors-panacis</i> | <i>P. quinquefolius</i> | Shandong, China |          | Shandong |
| OZT1-3-3 | <i>I. mors-panacis</i> | <i>P. quinquefolius</i> | Shandong, China |          | Shandong |
| 1-2-1    | <i>I. mors-panacis</i> | <i>P. quinquefolius</i> | Shandong, China |          | Shandong |
| 1-2-2    | <i>I. mors-panacis</i> | <i>P. quinquefolius</i> | Shandong, China |          | Shandong |
| 2-2-2    | <i>I. mors-panacis</i> | <i>P. quinquefolius</i> | Shandong, China |          | Shandong |
| 3-1-1    | <i>I. mors-panacis</i> | <i>P. quinquefolius</i> | Shandong, China |          | Shandong |
| 3-2-1    | <i>I. mors-panacis</i> | <i>P. quinquefolius</i> | Shandong, China |          | Shandong |
| 4-3-1    | <i>I. mors-panacis</i> | <i>P. quinquefolius</i> | Shandong, China |          | Shandong |
| 5-2-1    | <i>I. mors-panacis</i> | <i>P. quinquefolius</i> | Shandong, China |          | Shandong |
| FOH9-3   | <i>I. mors-panacis</i> | <i>P. quinquefolius</i> | Shandong, China | MN833110 | Shandong |
| S10-1    | <i>I. mors-panacis</i> | <i>P. quinquefolius</i> | Shandong, China |          | Shandong |
| 12-3-1   | <i>I. robusta</i>      | <i>P. quinquefolius</i> | Shandong, China | MN833112 | Shandong |
| OZTB1-2  | <i>I. robusta</i>      | <i>P. quinquefolius</i> | Shandong, China | MN833113 | Shandong |
| SX1      | <i>I. mors-panacis</i> | <i>P. notoginseng</i>   | Yunnan, China   |          | Yunnan   |
| SX2      | <i>I. mors-panacis</i> | <i>P. notoginseng</i>   | Yunnan, China   |          | Yunnan   |
| SX4      | <i>I. mors-panacis</i> | <i>P. notoginseng</i>   | Yunnan, China   |          | Yunnan   |
| SX5      | <i>I. mors-panacis</i> | <i>P. notoginseng</i>   | Yunnan, China   |          | Yunnan   |
| SZ1      | <i>I. mors-panacis</i> | <i>P. notoginseng</i>   | Yunnan, China   |          | Yunnan   |
| SZ2      | <i>I. mors-panacis</i> | <i>P. notoginseng</i>   | Yunnan, China   |          | Yunnan   |
| SZ3      | <i>I. mors-panacis</i> | <i>P. notoginseng</i>   | Yunnan, China   |          | Yunnan   |
| SZ5      | <i>I. mors-panacis</i> | <i>P. notoginseng</i>   | Yunnan, China   |          | Yunnan   |
| SS3      | <i>I. mors-panacis</i> | <i>P. notoginseng</i>   | Yunnan, China   |          | Yunnan   |
| SS4      | <i>I. mors-panacis</i> | <i>P. notoginseng</i>   | Yunnan, China   |          | Yunnan   |
| SS5      | <i>I. mors-panacis</i> | <i>P. notoginseng</i>   | Yunnan, China   |          | Yunnan   |
